# Supplementary material
Source: PubMed Central journal article supplement (PMC8328973)
Supplement: djab003_supplementary_data.pdf [file djab003_supplementary_data.pdf]

## SUPPLEMENTARY MATERIALS

### Supplementary Methods

#### Missing Longitudinal Data

The Thinking and Living with Cancer Study is a longitudinal cohort study of older breast cancer survivors and frequency matched controls funded under two rounds of an National Cancer Institute grant (R01CA129769). Among the 708 participants included in the analytic sample, there were two real-world ways that data could be missing over the study period: 1) administrative losses, and 2) death or drop-out. We examined each of these causes of missing data to evaluate whether they could potentially be associated with changes in deficits accumulation scores or trajectories, cognition, or physical activity. We describe those analyses in the following sections.

First, the study began in 2010 under the original grant and included a protocol with 24-months of follow-up. New funding obtained in 2016 was discontinuous with the initial grant but allowed for extension of follow-up from 24 to 60 months for those still active in the study under a revised protocol. Thus, participants enrolled in the early study years completed assessments through 24-months under the original protocol and those that were not active at the time of the revised protocol were considered “administrative losses” at 36-months (n=219). These administrative losses were non-informative with respect to deficit accumulation or study outcomes (Supplementary Table 2). There was a difference in baseline sleep disturbances among the survivors that were administrative losses at 36 months vs. not, so we considered sleep as a covariate in analyses since sleep could potentially affect outcomes.

The second way that data could be missing was due to dropping out of the study or death. Study drop-out occurred among 8.6% of participants (11.6% [n=41] and 5.6% [n=20] in survivors and controls, respectively). Death rates were very low (0.7% of participants (0.8% [n=3] and 0.6% [n=2] in survivors and controls, respectively). Characteristics of those that dropped out or died compared to the remainder of the analytic sample are summarized on Supplementary Table 3.

Overall, missing data were primarily due to administrative losses unrelated to the study hypotheses. Missing data did not vary by trajectory group or study outcomes and analyses employed in the manuscript allow for random missingness and do not require participants to contribute complete data to be included.

## Supplementary Tables

Supplement Table 1. Deficits Accumulation Frailty Index with Baseline Distributions for Older Breast Cancer Survivors and Controls by Trajectory Group from Separate Latent Class Models

| Item                                        | Scoring | Remain Robust        |                     | Prefrail            |                    | Become Frailer      |                    |
|---------------------------------------------|---------|----------------------|---------------------|---------------------|--------------------|---------------------|--------------------|
|                                             |         | Survivors<br>(n=269) | Controls<br>(n=297) | Survivors<br>(n=53) | Controls<br>(n=24) | Survivors<br>(n=31) | Controls<br>(n=34) |
| Percent                                     |         |                      |                     |                     |                    |                     |                    |
| <b>IADL Subdomain (14 items)</b>            |         |                      |                     |                     |                    |                     |                    |
| 1. Can take bath/shower                     |         |                      |                     |                     |                    |                     |                    |
| Without help                                | 0       | 98.9                 | 99.7                | 92.5                | 95.8               | 100.0               | 100.0              |
| With some help                              | 0.5     | 1.1                  | 0.3                 | 7.5                 | 4.2                | 0.0                 | 0.0                |
| Completely unable                           | 1       | 0.0                  | 0.0                 | 0.0                 | 0.0                | 0.0                 | 0.0                |
| 2. Can dress/undress self                   |         |                      |                     |                     |                    |                     |                    |
| Without help                                | 0       | 98.9                 | 100.0               | 92.5                | 100.0              | 100.0               | 100.0              |
| With some help                              | 0.5     | 1.1                  | 0.0                 | 7.5                 | 0.0                | 0.0                 | 0.0                |
| Completely unable                           | 1       | 0.0                  | 0.0                 | 0.0                 | 0.0                | 0.0                 | 0.0                |
| 3. Can get in/out of bed                    |         |                      |                     |                     |                    |                     |                    |
| Without help                                | 0       | 100.0                | 100.0               | 94.3                | 100.0              | 100.0               | 100.0              |
| With some help                              | 0.5     | 0.0                  | 0.0                 | 5.7                 | 0.0                | 0.0                 | 0.0                |
| Completely unable                           | 1       | 0.0                  | 0.0                 | 0.0                 | 0.0                | 0.0                 | 0.0                |
| 4. Can walk                                 |         |                      |                     |                     |                    |                     |                    |
| Without help                                | 0       | 100.0                | 100.0               | 90.6                | 95.8               | 100.0               | 100.0              |
| With some help                              | 0.5     | 0.0                  | 0.0                 | 9.4                 | 0.0                | 0.0                 | 0.0                |
| Completely unable                           | 1       | 0.0                  | 0.0                 | 0.0                 | 4.2                | 0.0                 | 0.0                |
| 5. Can eat                                  |         |                      |                     |                     |                    |                     |                    |
| Without help                                | 0       | 100.0                | 100.0               | 100.0               | 100.0              | 100.0               | 100.0              |
| With some help                              | 0.5     | 0.0                  | 0.0                 | 0.0                 | 0.0                | 0.0                 | 0.0                |
| Completely unable                           | 1       | 0.0                  | 0.0                 | 0.0                 | 0.0                | 0.0                 | 0.0                |
| 6. Take care of own appearance              |         |                      |                     |                     |                    |                     |                    |
| Without help                                | 0       | 99.6                 | 100.0               | 96.2                | 100.0              | 100.0               | 100.0              |
| With some help                              | 0.5     | 0.4                  | 0.0                 | 3.8                 | 0.0                | 0.0                 | 0.0                |
| Completely unable                           | 1       | 0.0                  | 0.0                 | 0.0                 | 0.0                | 0.0                 | 0.0                |
| 7. Trouble getting to bathroom on time      |         |                      |                     |                     |                    |                     |                    |
| No                                          | 0       | 96.3                 | 92.6                | 69.2                | 45.8               | 87.1                | 79.4               |
| Yes or catheter                             | 1       | 3.7                  | 7.4                 | 30.8                | 54.2               | 12.9                | 20.6               |
| 8. Can go shopping for groceries or clothes |         |                      |                     |                     |                    |                     |                    |
| Without help                                | 0       | 97.4                 | 100.0               | 83.0                | 87.5               | 100.0               | 100.0              |
| With some help                              | 0.5     | 2.6                  | 0.0                 | 17.0                | 12.5               | 0.0                 | 0.0                |
| Completely unable                           | 1       | 0.0                  | 0.0                 | 0.0                 | 0.0                | 0.0                 | 0.0                |
| 9. Can do your housework                    |         |                      |                     |                     |                    |                     |                    |
| Without help                                | 0       | 85.5                 | 91.2                | 43.4                | 60.9               | 80.6                | 87.9               |
| With some help                              | 0.5     | 14.1                 | 8.4                 | 50.9                | 34.8               | 16.1                | 12.1               |
| Completely unable                           | 1       | 0.4                  | 0.3                 | 5.7                 | 4.3                | 3.2                 | 0.0                |
| 10. Can prepare own meals                   |         |                      |                     |                     |                    |                     |                    |
| Without help                                | 0       | 98.5                 | 100.0               | 84.9                | 91.7               | 100.0               | 100.0              |
| With some help                              | 0.5     | 1.5                  | 0.0                 | 15.1                | 8.3                | 0.0                 | 0.0                |
| Completely unable                           | 1       | 0.0                  | 0.0                 | 0.0                 | 0.0                | 0.0                 | 0.0                |

| Item                                                              | Scoring | Remain Robust        |                     | Prefrail            |                    | Become Frailer      |                    |
|-------------------------------------------------------------------|---------|----------------------|---------------------|---------------------|--------------------|---------------------|--------------------|
|                                                                   |         | Survivors<br>(n=269) | Controls<br>(n=297) | Survivors<br>(n=53) | Controls<br>(n=24) | Survivors<br>(n=31) | Controls<br>(n=34) |
| <b>11. Can take own medicine</b>                                  |         |                      |                     |                     |                    |                     |                    |
| Without help                                                      | 0       | 99.6                 | 100.0               | 96.2                | 100.0              | 100.0               | 100.0              |
| With some help                                                    | 0.5     | 0.4                  | 0.0                 | 3.8                 | 0.0                | 0.0                 | 0.0                |
| Completely unable                                                 | 1       | 0.0                  | 0.0                 | 0.0                 | 0.0                | 0.0                 | 0.0                |
| <b>12. Can handle own money</b>                                   |         |                      |                     |                     |                    |                     |                    |
| Without help                                                      | 0       | 100.0                | 100.0               | 100.0               | 100.0              | 100.0               | 100.0              |
| With some help                                                    | 0.5     | 0.0                  | 0.0                 | 0.0                 | 0.0                | 0.0                 | 0.0                |
| Completely unable                                                 | 1       | 0.0                  | 0.0                 | 0.0                 | 0.0                | 0.0                 | 0.0                |
| <b>13. Can use telephone</b>                                      |         |                      |                     |                     |                    |                     |                    |
| Without help                                                      | 0       | 100.0                | 100.0               | 100.0               | 100.0              | 100.0               | 100.0              |
| With some help                                                    | 0.5     | 0.0                  | 0.0                 | 0.0                 | 0.0                | 0.0                 | 0.0                |
| Completely unable                                                 | 1       | 0.0                  | 0.0                 | 0.0                 | 0.0                | 0.0                 | 0.0                |
| <b>14. Get to places out of walking distance</b>                  |         |                      |                     |                     |                    |                     |                    |
| Without help                                                      | 0       | 98.9                 | 99.7                | 88.7                | 83.3               | 100.0               | 94.1               |
| With some help                                                    | 0.5     | 1.1                  | 0.3                 | 11.3                | 16.7               | 0.0                 | 5.9                |
| Completely unable                                                 | 1       | 0.0                  | 0.0                 | 0.0                 | 0.0                | 0.0                 | 0.0                |
| <b>Physical Health Subdomain (5 items)</b>                        |         |                      |                     |                     |                    |                     |                    |
| <b>15. Health limited moderate activities (SF-12)</b>             |         |                      |                     |                     |                    |                     |                    |
| No, not limited at all                                            | 0       | 88.1                 | 89.2                | 45.3                | 37.5               | 80.6                | 55.9               |
| Yes, limited a little                                             | 0.5     | 10.0                 | 9.1                 | 32.1                | 45.8               | 19.4                | 29.4               |
| Yes, limited a lot                                                | 1       | 1.9                  | 1.7                 | 22.6                | 16.7               | 0.0                 | 14.7               |
| <b>16. Health limited climbing stairs (SF-12)</b>                 |         |                      |                     |                     |                    |                     |                    |
| No, not limited at all                                            | 0       | 84.0                 | 82.7                | 30.8                | 20.8               | 58.1                | 38.2               |
| Yes, limited a little                                             | 0.5     | 13.0                 | 14.6                | 36.5                | 41.7               | 41.9                | 38.2               |
| Yes, limited a lot                                                | 1       | 3.0                  | 2.7                 | 32.7                | 37.5               | 0.0                 | 23.5               |
| <b>17. Physical health limited work or activities (SF-12)</b>     |         |                      |                     |                     |                    |                     |                    |
| No, not limited at all                                            | 0       | 84.3                 | 86.4                | 26.9                | 33.3               | 74.2                | 44.1               |
| Yes, limited a little                                             | 0.5     | 13.5                 | 12.5                | 51.9                | 54.2               | 25.8                | 47.1               |
| Yes, limited a lot                                                | 1       | 2.2                  | 1.0                 | 21.2                | 12.5               | 0.0                 | 8.8                |
| <b>18. Physical health resulted in accomplishing less (SF-12)</b> |         |                      |                     |                     |                    |                     |                    |
| No, not limited at all                                            | 0       | 83.3                 | 83.4                | 11.3                | 20.8               | 51.6                | 47.1               |
| Yes, limited a little                                             | 0.5     | 16.0                 | 15.2                | 62.3                | 62.5               | 48.4                | 44.1               |
| Yes, limited a lot                                                | 1       | 0.7                  | 1.4                 | 26.4                | 16.7               | 0.0                 | 8.8                |
| <b>19. Timed Up and Go in seconds</b>                             |         |                      |                     |                     |                    |                     |                    |
| Age 60-69:<br>≤8.1 sec                                            |         |                      |                     |                     |                    |                     |                    |
| 70-<80: ≤9.2 sec,                                                 | 0       | 6.3                  | 10.8                | 3.8                 | 0.0                | 0.0                 | 5.9                |
| 80+: ≤11.3 sec                                                    |         |                      |                     |                     |                    |                     |                    |
| Age 60-69: >8.1 sec                                               |         |                      |                     |                     |                    |                     |                    |
| 70 to <80: >9.2 sec                                               | 1       | 91.4                 | 88.6                | 75.5                | 91.7               | 93.5                | 85.3               |
| 80+: >11.3 sec                                                    |         |                      |                     |                     |                    |                     |                    |
| Unable to get up                                                  | 1       | 2.2                  | 0.7                 | 20.8                | 8.3                | 6.5                 | 8.8                |

| Item                                                                       | Scoring | Remain Robust        |                     | Prefrail            |                    | Become Frailer      |                    |
|----------------------------------------------------------------------------|---------|----------------------|---------------------|---------------------|--------------------|---------------------|--------------------|
|                                                                            |         | Survivors<br>(n=269) | Controls<br>(n=297) | Survivors<br>(n=53) | Controls<br>(n=24) | Survivors<br>(n=31) | Controls<br>(n=34) |
| <b>Emotional Health Subdomain (4 Items)</b>                                |         |                      |                     |                     |                    |                     |                    |
| 20. Emotional problems limited work or activities (SF-12)                  |         |                      |                     |                     |                    |                     |                    |
| No, not limited at all                                                     | 0       | 97.0                 | 94.9                | 74.0                | 70.8               | 87.1                | 82.4               |
| Yes, limited a little                                                      | 0.5     | 3.0                  | 4.7                 | 22.0                | 16.7               | 9.7                 | 17.6               |
| Yes, limited a lot                                                         | 1       | 0.0                  | 0.3                 | 4.0                 | 12.5               | 3.2                 | 0.0                |
| 21. Emotional problems resulted in accomplishing less (SF-12)              |         |                      |                     |                     |                    |                     |                    |
| No, not limited at all                                                     | 0       | 94.8                 | 92.3                | 64.2                | 66.7               | 87.1                | 76.5               |
| Yes, limited a little                                                      | 0.5     | 4.5                  | 6.7                 | 30.2                | 20.8               | 12.9                | 23.5               |
| Yes, limited a lot                                                         | 1       | 0.7                  | 1.0                 | 5.7                 | 12.5               | 0.0                 | 0.0                |
| 22. Felt downhearted or blue (SF-12)                                       |         |                      |                     |                     |                    |                     |                    |
| None of the time                                                           | 0       | 70.3                 | 61.4                | 55.8                | 33.3               | 51.6                | 38.2               |
| A little of the time                                                       | 0.25    | 25.2                 | 27.8                | 21.2                | 25.0               | 35.5                | 50.0               |
| Some of the time                                                           | 0.5     | 3.0                  | 9.2                 | 15.4                | 29.2               | 12.9                | 8.8                |
| Good bit of the time                                                       | 0.75    | 0.0                  | 0.7                 | 3.8                 | 8.3                | 0.0                 | 2.9                |
| Most of the time                                                           | 1       | 1.5                  | 1.0                 | 3.8                 | 4.2                | 0.0                 | 0.0                |
| All of the time                                                            | 1       | 0.0                  | 0.0                 | 0.0                 | 0.0                | 0.0                 | 0.0                |
| 23. Felt calm or peaceful (SF-12)                                          |         |                      |                     |                     |                    |                     |                    |
| All of the time                                                            | 0       | 19.9                 | 19.3                | 11.5                | 4.2                | 6.5                 | 2.9                |
| Most of the time                                                           | 0       | 62.9                 | 56.9                | 40.4                | 25.0               | 54.8                | 44.1               |
| Good bit of the time                                                       | 0.25    | 9.4                  | 12.5                | 15.4                | 37.5               | 16.1                | 20.6               |
| Some of the time                                                           | 0.5     | 5.2                  | 6.8                 | 19.2                | 20.8               | 19.4                | 29.4               |
| A little of the time                                                       | 0.75    | 1.1                  | 3.4                 | 11.5                | 8.3                | 3.2                 | 2.9                |
| None of the time                                                           | 1       | 1.5                  | 1.0                 | 1.9                 | 4.2                | 0.0                 | 0.0                |
| <b>General Health Subdomain (1 item)</b>                                   |         |                      |                     |                     |                    |                     |                    |
| 24. General Health (SF-12)                                                 |         |                      |                     |                     |                    |                     |                    |
| Excellent                                                                  | 0       | 43.1                 | 40.5                | 1.9                 | 8.3                | 6.5                 | 0.0                |
| Very Good                                                                  | 0.25    | 42.8                 | 38.9                | 35.8                | 37.5               | 38.7                | 41.2               |
| Good                                                                       | 0.5     | 12.6                 | 19.3                | 45.3                | 33.3               | 45.2                | 47.1               |
| Fair                                                                       | 0.75    | 1.5                  | 1.4                 | 17.0                | 16.7               | 9.7                 | 11.8               |
| Poor                                                                       | 1       | 0.0                  | 0.0                 | 0.0                 | 4.2                | 0.0                 | 0.0                |
| <b>Social Function Subdomain (2 items)</b>                                 |         |                      |                     |                     |                    |                     |                    |
| 25. Physical or emotional health interfered with social activities (SF-12) |         |                      |                     |                     |                    |                     |                    |
| None of the time                                                           | 0       | 91.8                 | 84.7                | 47.1                | 54.2               | 87.1                | 61.8               |
| A little of the time                                                       | 0.25    | 6.3                  | 8.8                 | 33.3                | 20.8               | 9.7                 | 29.4               |
| Some of the time                                                           | 0.5     | 1.5                  | 4.4                 | 11.8                | 12.5               | 3.2                 | 5.9                |
| Good bit of the time                                                       | 0.5     | 0.0                  | 0.7                 | 3.9                 | 4.2                | 0.0                 | 2.9                |
| Most of the time                                                           | 1       | 0.4                  | 1.0                 | 3.9                 | 4.2                | 0.0                 | 0.0                |
| All of the time                                                            | 1       | 0.0                  | 0.3                 | 0.0                 | 4.2                | 0.0                 | 0.0                |
| 26. Marital status                                                         |         |                      |                     |                     |                    |                     |                    |
| Married                                                                    | 0       | 64.7                 | 52.9                | 39.6                | 16.7               | 64.5                | 38.2               |
| Non-married                                                                | 1       | 35.3                 | 47.1                | 60.4                | 83.3               | 35.5                | 61.8               |

| Item                                                                             | Scoring | Remain Robust        |                     | Prefrail            |                    | Become Frailer      |                    |
|----------------------------------------------------------------------------------|---------|----------------------|---------------------|---------------------|--------------------|---------------------|--------------------|
|                                                                                  |         | Survivors<br>(n=269) | Controls<br>(n=297) | Survivors<br>(n=53) | Controls<br>(n=24) | Survivors<br>(n=31) | Controls<br>(n=34) |
| <b>Fatigue Subdomain (2 items)</b>                                               |         |                      |                     |                     |                    |                     |                    |
| 27. Had a lot of energy (SF-12)                                                  |         |                      |                     |                     |                    |                     |                    |
| All of the time                                                                  | 0       | 26.9                 | 22.0                | 2.0                 | 8.3                | 9.7                 | 2.9                |
| Most of the time                                                                 | 0       | 53.7                 | 53.7                | 35.3                | 12.5               | 35.5                | 47.1               |
| Good bit of the time                                                             | 0.25    | 10.8                 | 11.8                | 17.6                | 8.3                | 19.4                | 11.8               |
| Some of the time                                                                 | 0.5     | 6.3                  | 10.1                | 29.4                | 58.3               | 25.8                | 23.5               |
| A little of the time                                                             | 0.75    | 1.5                  | 1.4                 | 9.8                 | 4.2                | 9.7                 | 14.7               |
| None of the time                                                                 | 1       | 0.7                  | 1.0                 | 5.9                 | 8.3                | 0.0                 | 0.0                |
| 28. FACIT-F Fatigue Subscale <sup>a</sup>                                        |         |                      |                     |                     |                    |                     |                    |
| None                                                                             | 0       | 11.2                 | 18.5                | 0.0                 | 12.5               | 3.2                 | 2.9                |
| 39-<52: Little                                                                   | 0.25    | 75.0                 | 77.8                | 52.8                | 54.2               | 64.5                | 67.6               |
| 26-<39: Somewhat                                                                 | 0.5     | 10.8                 | 3.4                 | 34.0                | 29.2               | 22.6                | 20.6               |
| 13-<26: Quite a bit                                                              | 0.75    | 2.2                  | 0.3                 | 9.4                 | 4.2                | 6.5                 | 8.8                |
| 0 to <13: Severe                                                                 | 1       | 0.7                  | 0.0                 | 3.8                 | 0.0                | 3.2                 | 0.0                |
| <b>Disease Subdomain (10 items)</b>                                              |         |                      |                     |                     |                    |                     |                    |
| 29. Heart Disease (angina, arrhythmia, congestive heart failure, heart attack)   |         |                      |                     |                     |                    |                     |                    |
| None                                                                             | 0       | 87.7                 | 86.9                | 64.2                | 62.5               | 80.6                | 97.0               |
| Any                                                                              | 1       | 12.3                 | 13.1                | 35.8                | 37.5               | 19.4                | 3.0                |
| 30. Diabetes                                                                     |         |                      |                     |                     |                    |                     |                    |
| None                                                                             | 0       | 94.8                 | 94.9                | 62.3                | 91.7               | 86.7                | 78.1               |
| Any                                                                              | 1       | 5.2                  | 5.1                 | 37.7                | 8.3                | 13.3                | 21.9               |
| 31. Arthritis, Rheumatism, or other connective tissue disorder                   |         |                      |                     |                     |                    |                     |                    |
| None                                                                             | 0       | 61.6                 | 58.6                | 18.9                | 16.7               | 38.7                | 21.9               |
| Any                                                                              | 1       | 38.4                 | 41.4                | 81.1                | 83.3               | 61.3                | 78.1               |
| 32. Emphysema, chronic bronchitis, asthma, chronic Obstructive Pulmonary Disease |         |                      |                     |                     |                    |                     |                    |
| None                                                                             | 0       | 88.5                 | 88.6                | 64.2                | 79.2               | 71.0                | 84.4               |
| Any                                                                              | 1       | 11.5                 | 11.4                | 35.8                | 20.8               | 29.0                | 15.6               |
| 33. Chronic Liver or Kidney Disease                                              |         |                      |                     |                     |                    |                     |                    |
| None                                                                             | 0       | 97.8                 | 98.3                | 96.2                | 91.7               | 90.3                | 90.6               |
| Any                                                                              | 1       | 2.2                  | 1.7                 | 3.8                 | 8.3                | 9.7                 | 9.4                |
| 34. Other Cancer (non-melanoma skin cancer, other cancer)                        |         |                      |                     |                     |                    |                     |                    |
| None                                                                             | 0       | 97.8                 | 99.3                | 100.0               | 100.0              | 93.5                | 100.0              |
| Any                                                                              | 1       | 2.2                  | 0.7                 | 0.0                 | 0.0                | 6.5                 | 0.0                |
| 35. Glaucoma, Cataracts, or decreased vision                                     |         |                      |                     |                     |                    |                     |                    |
| None                                                                             | 0       | 84.8                 | 80.1                | 56.6                | 66.7               | 74.2                | 81.3               |
| Any                                                                              | 1       | 15.2                 | 19.9                | 43.4                | 33.3               | 25.8                | 18.8               |
| 36. Hypertension                                                                 |         |                      |                     |                     |                    |                     |                    |
| None                                                                             | 0       | 59.1                 | 67.9                | 35.8                | 29.2               | 35.5                | 45.5               |
| Any                                                                              | 1       | 40.9                 | 32.1                | 64.2                | 70.8               | 64.5                | 54.5               |
| 37. Osteoporosis                                                                 |         |                      |                     |                     |                    |                     |                    |
| None                                                                             | 0       | 83.5                 | 79.7                | 71.2                | 56.5               | 90.3                | 80.6               |
| Any                                                                              | 1       | 16.5                 | 20.3                | 28.8                | 43.5               | 9.7                 | 19.4               |
| 38. Thyroid disease (hyperthyroidism, hypothyroidism)                            |         |                      |                     |                     |                    |                     |                    |
| None                                                                             | 0       | 80.3                 | 82.8                | 66.0                | 66.7               | 74.2                | 78.1               |
| Any                                                                              | 1       | 19.7                 | 17.2                | 34.0                | 33.3               | 25.8                | 21.9               |

| Item                                 | Scoring | Remain Robust        |                     | Prefrail            |                    | Become Frailer      |                    |
|--------------------------------------|---------|----------------------|---------------------|---------------------|--------------------|---------------------|--------------------|
|                                      |         | Survivors<br>(n=269) | Controls<br>(n=297) | Survivors<br>(n=53) | Controls<br>(n=24) | Survivors<br>(n=31) | Controls<br>(n=34) |
| <b>Weight Subdomain (1 item)</b>     |         |                      |                     |                     |                    |                     |                    |
| 39. BMI                              |         |                      |                     |                     |                    |                     |                    |
| 18.5 to <30:<br>Normal/overweight    | 0       | 74.3                 | 77.8                | 35.3                | 47.8               | 44.4                | 50.0               |
| >=30: Obese                          | 1       | 24.9                 | 21.1                | 62.7                | 52.2               | 55.6                | 47.1               |
| <18.5: Under-weight                  | 1       | 0.8                  | 1.1                 | 2.0                 | 0.0                | 0.0                 | 2.9                |
| <b>Poly-pharm Subdomain (1 item)</b> |         |                      |                     |                     |                    |                     |                    |
| 40. Polypharmacy                     |         |                      |                     |                     |                    |                     |                    |
| <5 prescriptions                     | 0       | 78.8                 | 80.5                | 9.4                 | 33.3               | 51.6                | 61.8               |
| >=5 prescriptions                    | 1       | 21.2                 | 19.5                | 90.6                | 66.7               | 48.4                | 38.2               |
| <b>Depression Subdomain (1 item)</b> |         |                      |                     |                     |                    |                     |                    |
| 41. Depression -CES-D <sup>b</sup>   |         |                      |                     |                     |                    |                     |                    |
| 0 to <16: No to mild<br>depression   | 0       | 90.6                 | 97.3                | 71.4                | 75.0               | 85.7                | 85.3               |
| 16 to <24: Moderate<br>depression    | 0.5     | 6.0                  | 2.4                 | 10.2                | 16.7               | 7.1                 | 8.8                |
| 24 to <60: Severe<br>depression      | 1       | 3.4                  | 0.3                 | 18.4                | 8.3                | 7.1                 | 5.9                |
| <b>Anxiety Subdomain (1 item)</b>    |         |                      |                     |                     |                    |                     |                    |
| 42. STAI A-State scale <sup>c</sup>  |         |                      |                     |                     |                    |                     |                    |
| 20 to <38: No or low<br>anxiety      | 0       | 89.6                 | 94.6                | 77.4                | 82.6               | 83.3                | 93.8               |
| 38 to <45: Moderate<br>anxiety       | 0.5     | 6.3                  | 5.1                 | 11.3                | 4.3                | 6.7                 | 0.0                |
| 45 to 80: Severe<br>anxiety          | 1       | 4.1                  | 0.3                 | 11.3                | 13.0               | 10.0                | 6.3                |

a. Fatigue includes 13 items scored from 0-4 each for a total of 0-52 (higher=less fatigue). Non-missing items are averaged and then multiplied by 13 to calculate the total score. Must have 50%+ or 7+ items to score. Total score is used to assign frailty item score.

b. Depression is based on 20 items scaled from 0-3 each for a total of 0-60 (higher=more depression, 16+ is clinically significant). Non-missing items are averaged and then multiplied by 20 to calculate the total score. Must have 95%+ or 19+ items to score. Total score is used to assign frailty item score.

c. Anxiety is based on 20 items scaled from 1-4 each for a total of 20-80 (higher=more anxiety, 38+ is recommended cutoff). Non-missing items are averaged and then multiplied by 20 to calculate the total score. Must have 90%+ or 18+ items to score. Total score is used to assign frailty item score.

| Supplementary Table 2. Characteristics of Participants by Administrative Loss at 36-months |                     |               |         |                     |               |         |
|--------------------------------------------------------------------------------------------|---------------------|---------------|---------|---------------------|---------------|---------|
|                                                                                            | Controls            |               |         | Survivors           |               |         |
|                                                                                            | Administrative loss |               |         | Administrative loss |               |         |
|                                                                                            | Yes<br>(n=112)      | No<br>(n=243) | P value | Yes<br>(n=107)      | No<br>(n=246) | P value |
|                                                                                            | Mean (SD) or % (n)  |               |         | Mean (SD) or % (n)  |               |         |
| Age                                                                                        | 68.7 (7.6)          | 67.6 (6.8)    | 0.18    | 68.0 (5.6)          | 68.2 (6.1)    | 0.79    |
| Race                                                                                       |                     |               | 0.72    |                     |               | 0.36    |
| White                                                                                      | 81.1 (90)           | 79.4 (193)    |         | 76.6 (82)           | 80.9 (199)    |         |
| Non-white                                                                                  | 18.9 (21)           | 20.6 (50)     |         | 23.4 (25)           | 19.1 (47)     |         |
| Education                                                                                  |                     |               | 0.70    |                     |               | 0.17    |
| <=12                                                                                       | 12.5 (14)           | 14.0 (34)     |         | 20.6 (22)           | 14.6 (36)     |         |
| >12 years                                                                                  | 87.5 (98)           | 86.0 (209)    |         | 79.4 (85)           | 85.4 (210)    |         |
| Education, years                                                                           | 15.3 (2.1)          | 15.5 (2.4)    | 0.47    | 15.0 (2.2)          | 15.4 (2.1)    | 0.08    |
| WRAT4 score                                                                                | 109.6<br>(14.5)     | 113.0 (16.5)  | 0.06    | 110.0 (13.7)        | 112.7 (15.9)  | 0.14    |
| Baseline deficit accumulation score                                                        | 0.13 (0.07)         | 0.13 (0.07)   | 0.99    | 0.15 (0.10)         | 0.14 (0.08)   | 0.27    |
| Frailty trajectory group                                                                   |                     |               | 0.19    |                     |               | 0.38    |
| Robust                                                                                     | 87.5 (98)           | 81.9 (199)    |         | 78.5 (84)           | 75.2 (185)    |         |
| Robust, becomes frail                                                                      | 5.4 (6)             | 11.5 (28)     |         | 5.6 (6)             | 10.2 (25)     |         |
| Pre-frail                                                                                  | 7.1 (8)             | 6.6 (16)      |         | 15.9 (17)           | 14.6 (36)     |         |
| Baseline self-reported cognition                                                           | 128.8<br>(13.7)     | 130.1 (17.0)  | 0.48    | 127.2 (18.4)        | 130.6 (17.3)  | 0.10    |
| Objective cognition                                                                        |                     |               |         |                     |               |         |
| Global score                                                                               | -0.10 (0.61)        | -0.03 (0.62)  | 0.27    | -0.08 (0.63)        | -0.06 (0.64)  | 0.77    |
| APE domain                                                                                 | -0.13 (0.65)        | -0.04 (0.65)  | 0.22    | -0.18 (0.75)        | -0.08 (0.63)  | 0.17    |
| LM domain                                                                                  | -0.08 (0.83)        | -0.01 (0.82)  | 0.49    | 0.01 (0.84)         | -0.05 (0.82)  | 0.51    |
| Baseline physical activity, met minutes/week                                               | 1958<br>(1673)      | 2073 (2127)   | 0.61    | 1360 (1351)         | 1258 (1341)   | 0.52    |
| Baseline sleep disturbance                                                                 | 28.6 (32)           | 24.0 (58)     | 0.35    | 45.8 (49)           | 31.3 (77)     | <.01    |
| Stage                                                                                      | ---                 | ---           | ---     |                     |               | 0.74    |
| DCIS                                                                                       |                     |               |         | 8.4 (9)             | 11.8 (29)     |         |
| Stage 1                                                                                    |                     |               |         | 56.1 (60)           | 56.1 (138)    |         |
| Stage 2a                                                                                   |                     |               |         | 26.2 (28)           | 22.4 (55)     |         |
| Stage 2b+                                                                                  |                     |               |         | 9.3 (10)            | 9.8 (24)      |         |
| Treatment                                                                                  | ---                 | ---           | ---     |                     |               | 0.18    |
| Chemotherapy                                                                               |                     |               |         | 23.3 (24)           | 30.4 (72)     |         |
| Hormonal only                                                                              |                     |               |         | 76.7 (79)           | 69.6 (165)    |         |

| Supplementary Table 3. Characteristics of Participants by Death or Drop Out |                    |               |         |                    |               |         |
|-----------------------------------------------------------------------------|--------------------|---------------|---------|--------------------|---------------|---------|
|                                                                             | Controls           |               |         | Survivors          |               |         |
|                                                                             | Dropped out/died   |               |         | Dropped out/died   |               |         |
|                                                                             | Yes<br>(n=22)      | No<br>(n=333) | P value | Yes<br>(n=44)      | No<br>(n=309) | P value |
|                                                                             | Mean (SD) or % (n) |               |         | Mean (SD) or % (n) |               |         |
| Age                                                                         | 68.8 (10.5)        | 67.9 (6.8)    | 0.54    | 68.3 (6.2)         | 68.1 (6.0)    | 0.86    |
| Race                                                                        |                    |               | 0.18    |                    |               | 0.43    |
| White                                                                       | 90.9 (20)          | 79.2 (263)    |         | 84.1 (37)          | 79.0 (244)    |         |
| Non-white                                                                   | 9.1 (2)            | 20.8 (69)     |         | 15.9 (7)           | 21.0 (65)     |         |
| Education, years                                                            | 15.1 (2.2)         | 15.4 (2.3)    | 0.50    | 14.8 (2.4)         | 15.4 (2.1)    | 0.12    |
| WRAT score                                                                  | 112.7 (16.1)       | 111.9 (16.0)  | 0.83    | 110.4 (17.5)       | 112.1 (14.9)  | 0.48    |
| Baseline deficit score                                                      | 0.11 (0.09)        | 0.14 (0.07)   | 0.11    | 0.14 (0.07)        | 0.15 (0.08)   | 0.41    |
| Frailty trajectory group                                                    |                    |               | 0.66    |                    |               | 0.39    |
| Robust                                                                      | 86.4 (19)          | 83.5 (278)    |         | 84.1 (37)          | 75.1 (232)    |         |
| Robust, becomes frail                                                       | 4.5 (1)            | 9.9 (33)      |         | 4.5 (2)            | 9.4 (29)      |         |
| Pre-frail                                                                   | 9.1 (2)            | 6.6 (22)      |         | 11.4 (5)           | 15.5 (48)     |         |
| Baseline self-reported cognition                                            | 131.2 (13.8)       | 129.6 (16.2)  | 0.65    | 129.7 (17.3)       | 129.6 (17.8)  | 0.95    |
| Objective cognition                                                         |                    |               |         |                    |               |         |
| Global score                                                                | 0.01 (0.54)        | -0.05 (0.62)  | 0.64    | -0.15 (0.72)       | -0.06 (0.62)  | 0.36    |
| APE domain                                                                  | 0.06 (0.44)        | -0.08 (0.66)  | 0.33    | -0.14 (0.71)       | -0.10 (0.67)  | 0.74    |
| LM domain                                                                   | -0.04 (0.77)       | -0.03 (0.83)  | 0.94    | -0.16 (0.91)       | -0.01 (0.82)  | 0.26    |
| Baseline physical activity, met minutes/week                                | 2426 (2902)        | 2011 (1920)   | 0.35    | 1295 (1504)        | 1288 (1320)   | 0.97    |
| Baseline sleep disturbance                                                  | 22.7 (5)           | 25.6 (85)     | 0.76    | 25.0 (11)          | 37.2 (115)    | 0.11    |
| Stage                                                                       | ---                | ---           | ---     |                    |               | 0.95    |
| DCIS                                                                        |                    |               |         | 9.1 (4)            | 11.0 (34)     |         |
| Stage 1                                                                     |                    |               |         | 54.5 (24)          | 56.3 (174)    |         |
| Stage 2a                                                                    |                    |               |         | 25.0 (11)          | 23.3 (72)     |         |
| Stage 2b+                                                                   |                    |               |         | 11.4 (5)           | 9.4 (29)      |         |
| Treatment                                                                   | ---                | ---           | ---     |                    |               | 0.91    |
| Chemotherapy                                                                |                    |               |         | 27.5 (11)          | 28.3 (85)     |         |
| Hormonal only                                                               |                    |               |         | 72.5 (29)          | 71.7 (215)    |         |



Supplementary Table 4. Model of Adjusted Deficits Accumulation Scores over Time used for Figure 2.

Mixed Model of Adjusted Deficits Accumulation Scores over Time (n=687)

|                                                    | Beta (SE)        | P value |
|----------------------------------------------------|------------------|---------|
| Age per one-year increase                          | 0.0020 (0.0004)  | <.001   |
| Race (non-white vs white)                          | 0.0160 (0.0076)  | 0.0350  |
| WRAT score per one-point increase                  | -0.0001 (0.0002) | 0.5566  |
| Chemotherapy +/- hormonal vs. hormonal vs. control | ---              | 0.0045  |
| Chemotherapy +/- hormonal vs. control              | 0.0237 (0.0086)  | 0.0063  |
| Hormonal only vs. control                          | 0.0160 (0.0062)  | 0.0107  |
| Time (vs. baseline)                                |                  | <.001   |
| 12 months                                          | 0.0121 (0.0024)  | <.001   |
| 24                                                 | 0.0192 (0.0025)  | <.001   |
| 36                                                 | 0.0211 (0.0034)  | <.001   |
| Baseline sleep disturbance (vs. no)                | 0.0207 (0.0061)  | 0.0063  |
| Model fit - BIC                                    | -5262.8          |         |

Controlling for recruitment site; p-values from tests of fixed effects

Supplementary Table 5. Model results used with mean centered scores to calculate adjusted mean scores plotted on Figure 2, Panel A and B.

|                | Adjusted mean score (95% CI) by time point, [sample size] |                                |                                |                                |
|----------------|-----------------------------------------------------------|--------------------------------|--------------------------------|--------------------------------|
|                | Baseline                                                  | 12                             | 24                             | 36                             |
| <b>Panel A</b> |                                                           |                                |                                |                                |
| Survivors      | 0.157 (0.142, 0.171),<br>[338]                            | 0.169 (0.154, 0.184),<br>[243] | 0.176 (0.161, 0.191),<br>[210] | 0.178 (0.162, 0.193),<br>[98]  |
| Controls       | 0.137 (0.121, 0.152),<br>[349]                            | 0.149 (0.133, 0.164),<br>[301] | 0.156 (0.140, 0.172),<br>[246] | 0.158 (0.142, 0.174),<br>[118] |
| <b>Panel B</b> |                                                           |                                |                                |                                |
| Survivors      |                                                           |                                |                                |                                |
| Chemo +/-HT    | 0.160 (0.142, 0.179),<br>[94]                             | 0.173 (0.154, 0.191),<br>[67]  | 0.180 (0.161, 0.198),<br>[60]  | 0.182 (0.162, 0.201),<br>[32]  |
| HT alone       | 0.153 (0.137, 0.169),<br>[244]                            | 0.165 (0.149, 0.181),<br>[176] | 0.172 (0.156, 0.188),<br>[150] | 0.174 (0.157, 0.190),<br>[66]  |
| Controls       | 0.137 (0.121, 0.152),<br>[349]                            | 0.149 (0.133, 0.164),<br>[301] | 0.156 (0.140, 0.172),<br>[246] | 0.158 (0.142, 0.174),<br>[118] |

Chemo=chemotherapy; HT= hormonal therapy

Supplementary Table 6. Mixed Model Results for Self-Reported Cognition (Figure 4, Panel A)

| Mixed model results                                         | Self-reported Cognitive Function (FACT-Cog Total) |         |                             |         |
|-------------------------------------------------------------|---------------------------------------------------|---------|-----------------------------|---------|
|                                                             | Model with Survivors (n=335)                      |         | Model with Controls (n=346) |         |
|                                                             | Beta (SE)                                         | P value | Beta (SE)                   | P value |
| Age per one-year increase                                   | -0.06 (0.15)                                      | .6919   | 0.02 (0.10)                 | .8462   |
| Race (non-white vs white)                                   | -0.35 (2.26)                                      | .8770   | 1.75 (1.98)                 | .3766   |
| WRAT score per 1-point increase                             | 0.05 (0.06)                                       | .3956   | 0.10 (0.05)                 | .0320   |
| Deficits accumulation trajectory group (vs. remains robust) | ---                                               | .002    | ---                         | <.001   |
| Prefrail                                                    | -8.19 (2.71)                                      | .0028   | -15.9 (3.27)                | <.001   |
| Starts robust, becomes frailer                              | -1.51 (3.33)                                      | .6507   | -13.1 (2.76)                | <.001   |
| Chemotherapy +/- hormonal vs. hormonal                      | -0.62 (1.93)                                      | .7483   | ---                         | ---     |
| Time (vs. baseline)                                         |                                                   | .0025   |                             | .5447   |
| 12 months                                                   | -1.61 (1.12)                                      | .1527   | 0.31 (0.82)                 | .7090   |
| 24                                                          | -1.19 (1.16)                                      | .3068   | -0.03 (0.87)                | .9734   |
| 36                                                          | -3.24 (1.61)                                      | .0454   | 1.57 (1.18)                 | .1823   |
| Deficits accumulation trajectory group by time              | ---                                               | .0950   | ---                         | .0011   |
| 12m prefrail vs. baseline robust                            | 1.75 (2.92)                                       | .5484   | 3.01 (2.84)                 | .2890   |
| 24m prefrail vs. baseline robust                            | -1.98 (3.14)                                      | .5283   | 6.49 (3.22)                 | .044    |
| 36m prefrail vs. baseline robust                            | 2.01 (3.91)                                       | .6071   | 7.18 (4.01)                 | .0737   |
| 12m frail vs. baseline robust                               | -3.34 (3.15)                                      | .2889   | -5.33 (2.42)                | .0281   |
| 24m frail vs. baseline robust                               | -10.28 (3.43)                                     | .0028   | -9.63 (2.61)                | .0002   |
| 36m frail vs. baseline robust                               | -6.38 (4.46)                                      | .1532   | -7.53 (3.30)                | .0229   |
| Model fit - BIC                                             | 7174.1                                            |         | 7839.4                      |         |

Controlling for recruitment site; p-values from tests of fixed effects

Supplementary Table 7. Model results used with mean centered scores to calculate adjusted scores plotted on Figure 4, Panel A.

|                  | Adjusted mean FACT-Cog Total score (95% CI) by time point, [sample size] |                                |                                |                               |
|------------------|--------------------------------------------------------------------------|--------------------------------|--------------------------------|-------------------------------|
|                  | Baseline                                                                 | 12                             | 24                             | 36                            |
| <b>Survivors</b> |                                                                          |                                |                                |                               |
| Robust           | 133.0 (129.6, 136.5),<br>[253]                                           | 131.4 (127.8, 135.0),<br>[181] | 131.9 (128.2, 135.5),<br>[163] | 129.8 (125.6, 134.0),<br>[72] |
| Prefrail         | 124.9 (119.4, 130.3),<br>[51]                                            | 125.0 (118.8, 131.2),<br>[31]  | 121.7 (115.1, 128.3),<br>[25]  | 123.6 (115.9, 131.3),<br>[15] |
| Frail            | 131.5 (124.8, 138.3),<br>[31]                                            | 126.6 (119.6, 133.6),<br>[27]  | 120.1 (112.6, 128.0),<br>[21]  | 121.9 (112.9, 131.0),<br>[11] |
| <b>Controls</b>  |                                                                          |                                |                                |                               |
| Robust           | 133.2 (130.8, 135.6),<br>[289]                                           | 133.5 (131.1, 136.0),<br>[241] | 133.2 (130.7, 135.7),<br>[205] | 134.8 (131.8, 137.8),<br>[93] |
| Prefrail         | 117.4 (111.0, 123.8),<br>[23]                                            | 120.7 (114.3, 127.1),<br>[23]  | 123.8 (116.8, 130.8),<br>[16]  | 126.1 (117.8, 134.4),<br>[9]  |
| Frail            | 120.1 (114.7, 125.5),<br>[34]                                            | 115.1 (109.6, 120.6),<br>[31]  | 110.4 (104.6, 116.2),<br>[25]  | 114.1 (107.3, 121.0),<br>[14] |

Supplementary Table 8. Mixed Model Results for Attention, Processing Speed, and Executive Function (APE) Domain Score (Figure 4, Panel B)

| Mixed model results                                         | APE z-score                 |         |                            |         |
|-------------------------------------------------------------|-----------------------------|---------|----------------------------|---------|
|                                                             | Model for Survivors (n=340) |         | Model for Controls (n=354) |         |
|                                                             | Beta (SE)                   | P value | Beta (SE)                  | P value |
| Age per one-year increase                                   | -0.03 (0.01)                | <.001   | -0.02 (0.00)               | <.001   |
| Race (non-white vs white)                                   | -0.28 (0.08)                | .0005   | -0.39 (0.08)               | <.001   |
| WRAT score per 1-point increase                             | 0.02 (0.00)                 | <.001   | 0.01 (0.00)                | <.001   |
| Deficits accumulation trajectory group (vs. remains robust) |                             | .0004   |                            | .0521   |
| prefrail                                                    | -0.34 (0.09)                | <.001   | -0.24 (0.11)               | .0300   |
| Starts robust, becomes frailer                              | -0.02 (0.10)                | .8364   | -0.12 (0.09)               | .1935   |
| Chemotherapy +/- hormonal vs. hormonal vs. control          | -0.03 (0.07)                | .6101   | ---                        | ---     |
| Time (vs. baseline)                                         |                             | <.001   |                            | <.0001  |
| 12 months                                                   | 0.09 (0.03)                 | .0016   | 0.08 (0.02)                | .0011   |
| 24                                                          | 0.11 (0.03)                 | .0001   | 0.12 (0.02)                | <.0001  |
| 36                                                          | 0.15 (0.04)                 | .0004   | 0.09 (0.03)                | .0070   |
| Deficits accumulation trajectory group by time              | ---*                        | ---     | ---*                       | ---     |
| Model fit - BIC                                             | 1287.0                      |         | 1231.9                     |         |

Controlling for recruitment site; p-values from tests of fixed effects

\* interaction not significant and not retained in either final case or final control model

Supplementary Table 9. Model results used with mean centered scores to calculate adjusted scores plotted on Figure 4, Panel B

|           | Adjusted mean APE z-score (95% CI) by time point, [sample size] |                               |                               |                               |
|-----------|-----------------------------------------------------------------|-------------------------------|-------------------------------|-------------------------------|
|           | Baseline                                                        | 12                            | 24                            | 36                            |
| Survivors |                                                                 |                               |                               |                               |
| Robust    | -0.07 (-0.20, 0.05),<br>[256]                                   | 0.02 (-0.11, 0.14),<br>[193]  | 0.04 (-0.08, 0.16),<br>[172]  | 0.07 (-0.06, 0.21),<br>[76]   |
| Prefrail  | -0.42 (-0.60, -0.24),<br>[53]                                   | -0.33 (-0.51, -.15),<br>[34]  | -0.30 (-0.49, -0.12),<br>[27] | -0.27 (-0.46, -0.08),<br>[17] |
| Frail     | -0.10 (-0.31, 0.12),<br>[31]                                    | -0.01 (-0.22, 0.21),<br>[29]  | 0.02 (-0.20, 0.24),<br>[25]   | 0.05 (-0.17, 0.27),<br>[11]   |
| Controls  |                                                                 |                               |                               |                               |
| Robust    | -0.14 (-0.23, -0.05),<br>[296]                                  | -0.06 (-0.16, 0.03),<br>[258] | -0.02 (-0.11, 0.07),<br>[217] | -0.05 (-0.15, 0.05),<br>[99]  |
| Prefrail  | -0.38 (-0.60, -0.16),<br>[24]                                   | -0.30 (-0.52, -0.09),<br>[23] | -0.26 (-0.48, -0.04),<br>[17] | -0.29 (-0.52, -0.07),<br>[11] |
| Frail     | -0.26 (-0.45, -0.07),<br>[34]                                   | -0.19 (-0.37, 0.00),<br>[33]  | -0.14 (-0.33, 0.05),<br>[26]  | -0.17 (-0.37, 0.02),<br>[16]  |

Supplementary Table 10. Mixed Model Results for Learning and Memory (LM) Domain Score (not shown in text)

| Mixed model results                                         | LM z-score                  |         |                            |         |
|-------------------------------------------------------------|-----------------------------|---------|----------------------------|---------|
|                                                             | Model for Survivors (n=340) |         | Model for Controls (n=354) |         |
|                                                             | Beta (SE)                   | P value | Beta (SE)                  | P value |
| Age per one-year increase                                   | -0.39 (0.50)                | 0.0144  | -0.02 (0.01)               | <.001   |
| Race (non-white vs white)                                   | -0.02 (0.01)                | <0.001  | -0.22 (0.10)               | 0.0321  |
| WRAT score per 1-point increase                             | -0.38 (0.10)                | <.001   | 0.02 (0.00)                | <.001   |
| Deficits accumulation trajectory group (vs. remains robust) |                             | 0.0880  |                            | 0.008   |
| prefrail                                                    | -0.22 (0.11)                | 0.0345  | -0.37 (0.15)               | 0.0133  |
| Starts robust, becomes frailer                              | 0.04 (0.13)                 | 0.7436  | 0.21 (0.13)                | 0.1000  |
| Chemotherapy +/- hormonal vs. hormonal                      | 0.02 (0.08)                 | 0.7829  | ---                        | ---     |
| Time (vs. baseline)                                         |                             | <.001   |                            | <.001   |
| 12 months                                                   | 0.18 (0.04)                 | <.001   | 0.19 (0.03)                | <.001   |
| 24                                                          | 0.23 (0.04)                 | <.001   | 0.16 (0.04)                | <.001   |
| 36                                                          | 0.30 (0.06)                 | <.001   | 0.37 (0.05)                | <.001   |
| Deficits accumulation trajectory group by time              | ---*                        | ---     | ---*                       | ---     |
| Model fit - BIC                                             | 1800.0                      |         | 2000.9                     |         |

Controlling for recruitment site; p-values from tests of fixed effects

\* interaction not significant and not retained in either final case or final control model

Supplementary Table 11. Model results used with mean centered scores to calculate adjusted scores (not shown in paper)

|                  | Adjusted mean LM z-score (95% CI) by time point, [sample size] |                                |                                |                              |
|------------------|----------------------------------------------------------------|--------------------------------|--------------------------------|------------------------------|
|                  | Baseline                                                       | 12                             | 24                             | 36                           |
| <b>Survivors</b> |                                                                |                                |                                |                              |
| Robust           | -0.12 (-0.27, 0.03),<br>[256]                                  | 0.05 (-0.10, 0.21),<br>[193]   | 0.11 (-0.05, 0.26),<br>[172]   | 0.17 (0.00, 0.34),<br>[76]   |
| Prefrail         | -0.35 (-0.57, -0.13),<br>[53]                                  | -0.17 (-0.40,<br>0.05), [34]   | -0.12 (-0.35, 0.11),<br>[27]   | -0.05 (-0.29, 0.18),<br>[17] |
| Frail            | -0.08 (-0.35, 0.18),<br>[31]                                   | 0.09 (-0.17, 0.36),<br>[29]    | 0.15 (-0.12, 0.42),<br>[25]    | 0.21 (-0.06, 0.49),<br>[11]  |
| <b>Controls</b>  |                                                                |                                |                                |                              |
| Robust           | -0.13 (-0.25, -0.00),<br>[296]                                 | 0.06 (-0.06, 0.19),<br>[258]   | 0.04 (-0.09, 0.16),<br>[217]   | 0.24 (0.10, 0.38),<br>[99]   |
| Prefrail         | -0.50 (-0.80, -0.20),<br>[24]                                  | -0.31 (-0.61, -<br>0.01), [23] | -0.34 (-0.64, -<br>0.04), [17] | -0.13 (-0.44, 0.17),<br>[11] |
| Frail            | 0.08 (-0.17, 0.34),<br>[34]                                    | 0.27 (0.02, 0.53),<br>[33]     | 0.25 (-0.01, 0.50),<br>[26]    | 0.45 (0.19, 0.72),<br>[16]   |



Supplementary Table 12. Mixed Model Results for Self-reported Physical Activity

|                                                             | Model for Survivors (n=332) |         | Model for Controls (n=352) |         |
|-------------------------------------------------------------|-----------------------------|---------|----------------------------|---------|
|                                                             | Beta (SE)                   | P value | Beta (SE)                  | P value |
| Age per one-year increase                                   | -0.1277 (0.1270)            | .3157   | -0.1727 (0.1166)           | .1395   |
| Race (non-white vs white)                                   | 0.6045 (1.9485)             | .7566   | 2.9736 (2.1969)            | .1768   |
| WRAT score per 1-point increase                             | -0.06019 (0.0505)           | .2339   | 0.08755 (0.05415)          | .1068   |
| Deficits accumulation trajectory group (vs. remains robust) | ---                         | <.001   | ---                        | .0004   |
| Prefrail                                                    | -7.632 (2.5456)             | .0029   | -5.2448 (3.1604)           | .0979   |
| Starts robust, becomes frailer                              | -1.6688 (3.1287)            | .5941   | -10.0348 (2.6761)          | .0002   |
| Chemotherapy +/- hormonal vs. hormonal                      | -1.4832 (1.6706)            | .3753   | ---                        | ---     |
| Time (vs. baseline)                                         | ---                         | ---     | ---                        | .7222   |
| 12 months                                                   | 3.8837(1.2792)              | .0025   | -0.7865 (1.0995)           | .4747   |
| 24                                                          | 4.9274 (1.3364)             | .0003   | -1.3086 (1.1763)           | .2664   |
| 36                                                          | 8.2056 (1.8280)             | <.0001  | -0.8508 (1.5776)           | .5899   |
| Deficits accumulation trajectory group by time              | ---                         | 0.0479  | ---                        | ---     |
| 12m prefrail vs. baseline robust                            | 0.7687 (3.3864)             | .8205   | ---                        | ---     |
| 24m prefrail vs. baseline robust                            | 3.2463 (3.5620)             | .3625   | ---                        | ---     |
| 36m prefrail vs. baseline robust                            | -3.5697 (4.6490)            | .4429   | ---                        | ---     |
| 12m frail vs. baseline robust                               | -6.0263 (3.6197)            | .0965   | ---                        | ---     |
| 24m frail vs. baseline robust                               | -8.5829 (3.8715)            | .0271   | ---                        | ---     |
| 36m frail vs. baseline robust                               | -15.9020 (5.4611)           | .0037   | ---                        | ---     |
| Model fit - BIC                                             | 7163.2                      |         | 8563.1                     |         |

Controlling for recruitment site; p-values from tests of fixed effects

\* interaction not significant and not retained in final control model

Supplementary Table 13. Adjusted values for self-report physical activity for Figure 4, Panel C

|           | Adjusted mean IPAQ total score in MET minutes/week (95% CI) by time point, [sample size] |                              |                              |                              |
|-----------|------------------------------------------------------------------------------------------|------------------------------|------------------------------|------------------------------|
|           | Baseline                                                                                 | 12                           | 24                           | 36                           |
| Survivors |                                                                                          |                              |                              |                              |
| Robust    | 1470 (1165, 1776), [250]                                                                 | 1859 (1534, 2183), [182]     | 1963 (1631, 2295), [161]     | 2291 (1885, 2697), [72]      |
| Prefrail  | 707 (206, 1208), [51]                                                                    | 1172 (558, 1786), [29]       | 1524 (879, 2169), [25]       | 1171 (335, 2006), [13]       |
| Frail     | 1303 (681, 1926), [31]                                                                   | 1089 (435, 1743), [27]       | 938 (236, 1640), [22]        | 534 (469, 1536), [9]         |
| Controls  |                                                                                          |                              |                              |                              |
| Robust    | 2138(1864, 2413), [294]                                                                  | 2060 (1774, 2346), [246]     | 2008 (1711, 2304), [207]     | 2053 (1692, 2415), [91]      |
| Prefrail  | 1614 (980, 2248), [24]                                                                   | 1535 (898, 2173), [22]       | 1483 (838, 2128), [15]       | 1529 (856, 2201), [10]       |
| Frail     | 1134.8 (590.2, 1679.5), [34]                                                             | 1056.2 (508.0, 1604.4), [32] | 1004.0 (448.3, 1559.7), [24] | 1049.8 (459.8, 1639.8), [14] |

## Supplementary Figures

Supplementary Figure 1. Observed Prevalence of Unadjusted Deficits Accumulation Index Scores over 36-months among Older Breast Cancer Survivors and Matched-Non-Cancer Controls

Panel A. Survivors

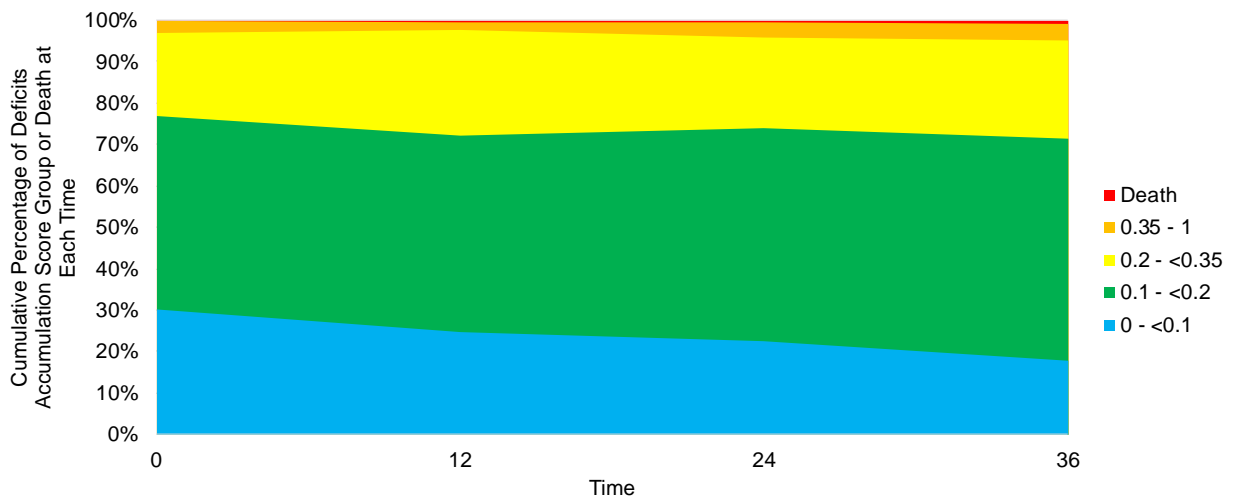

Panel B. Controls

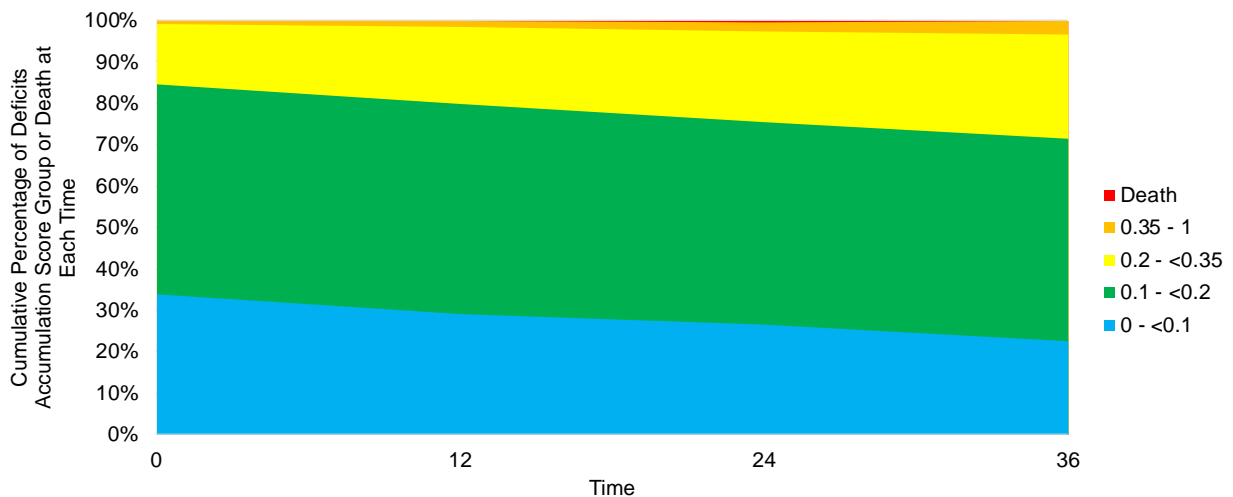

Deficits accumulation index scores range from 0 to 1. The graphs show the percent of women with unadjusted deficits accumulation scores in each of five groups at each time point. We selected five groups to correspond to having 0 to 5 deficits on the Fried phenotypic score range based on the methods described by Stenholm and colleagues.

Supplementary Figure 2. Probability of Transitioning between Deficits Accumulation Categories from Baseline to 36 months

Panel A. Survivors

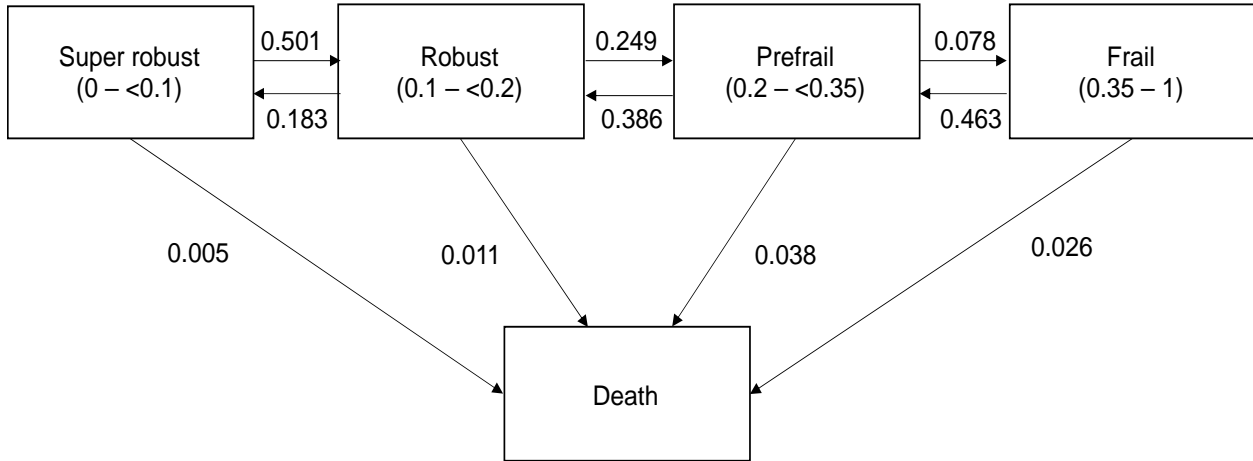

Panel B. Non-Cancer Controls

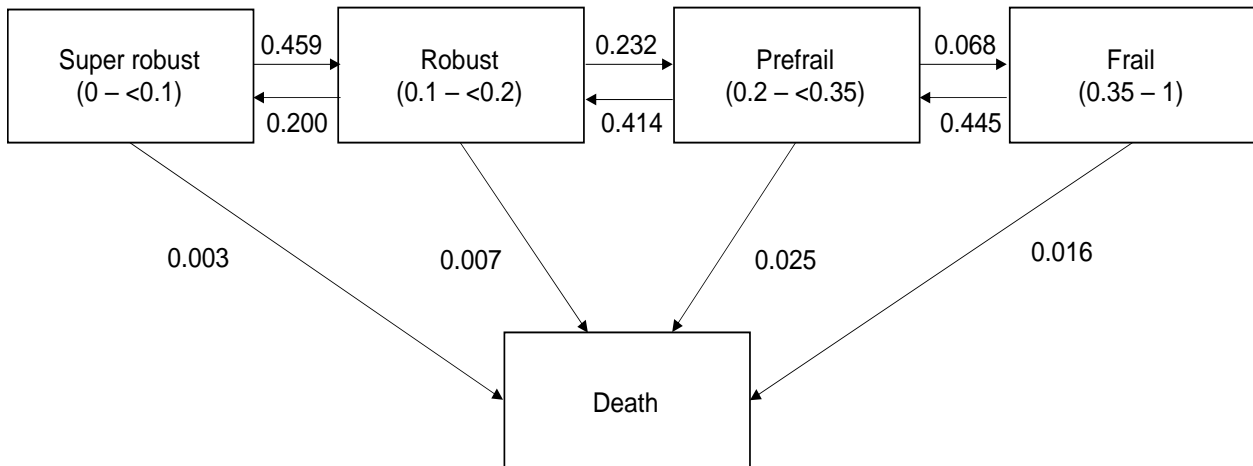

Multistate models of transitions between deficits accumulation score categories over 36-months from baseline.

Supplementary Figure 3. Deficits Accumulation Frailty Trajectories for Older Survivors and Frequency-Matched Non-Cancer Controls Combined

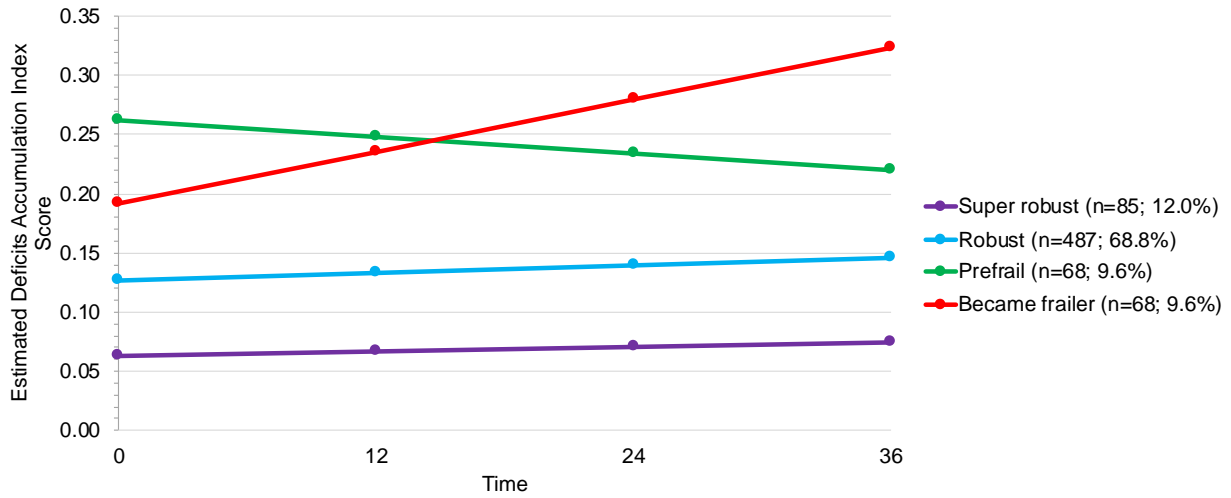

|                | Adjusted mean score (95% CI) by time point, [sample size] |                             |                             |                             |
|----------------|-----------------------------------------------------------|-----------------------------|-----------------------------|-----------------------------|
|                | Baseline                                                  | 12                          | 24                          | 36                          |
| Super robust   | 0.063 (0.049, 0.077), [84]                                | 0.067 (0.052, 0.081), [76]  | 0.071 (0.055, 0.086), [66]  | 0.074 (0.058, 0.091), [26]  |
| Robust         | 0.127 (0.117, 0.136), [485]                               | 0.133 (0.124, 0.142), [371] | 0.139 (0.130, 0.149), [314] | 0.146 (0.136, 0.156), [146] |
| Prefrail       | 0.262 (0.236, 0.288), [67]                                | 0.248 (0.226, 0.271), [48]  | 0.234 (0.212, 0.257), [34]  | 0.220 (0.193, 0.247), [23]  |
| Became frailer | 0.191 (0.175, 0.208), [66]                                | 0.235 (0.219, 0.251), [59]  | 0.280 (0.260, 0.299), [50]  | 0.324 (0.298, 0.349), [24]  |

Deficits accumulation index scores at each assessment were used to derive trajectory groups using growth mixture models. All data available are used from all woman. The number of trajectory groups was determined by having at least 2% of participants in a group, likelihood ratio tests, the smallest Bayesian information criterion (BIC), and a priori expectation. Based on these criteria, four groups best fit the data.
